# Supplementary material for: Coronary Artery Bypass Grafting in Women 50 Years or Younger
Source: PubMed Central journal article supplement — J Am Heart Assoc. 2019 Sep 14;8(18):e013211. doi: 10.1161/JAHA.119.013211 (PMC6818006; doi:10.1161/jaha.119.013211), 2019-09-14
Supplement: JAH3-8-e013211-s001.pdf [file JAH3-8-e013211-s001.pdf]

# **Supplemental Material**

**Figure S1. Number of primary isolated coronary artery bypass procedures by year and sex in patients ≤50 years of age in Sweden during 1995 to 2013.**

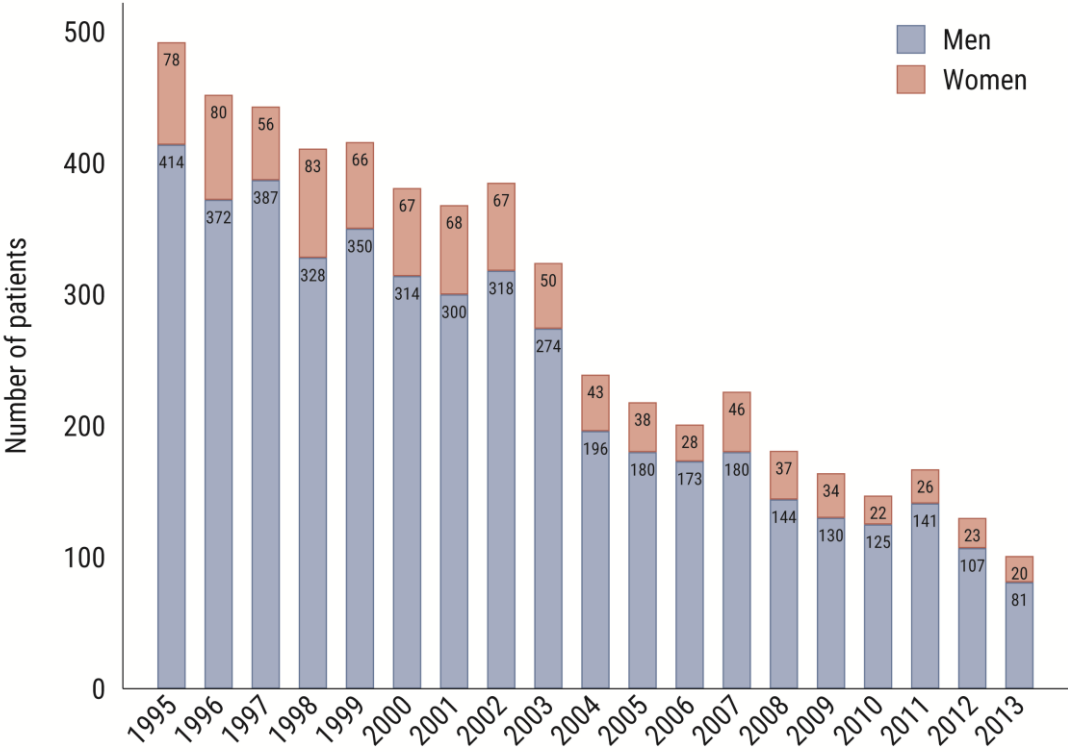

**Figure S2. Absolute standardized differences before (hollow circles) and after (filled circles) inverse probability of treatment weighting.**

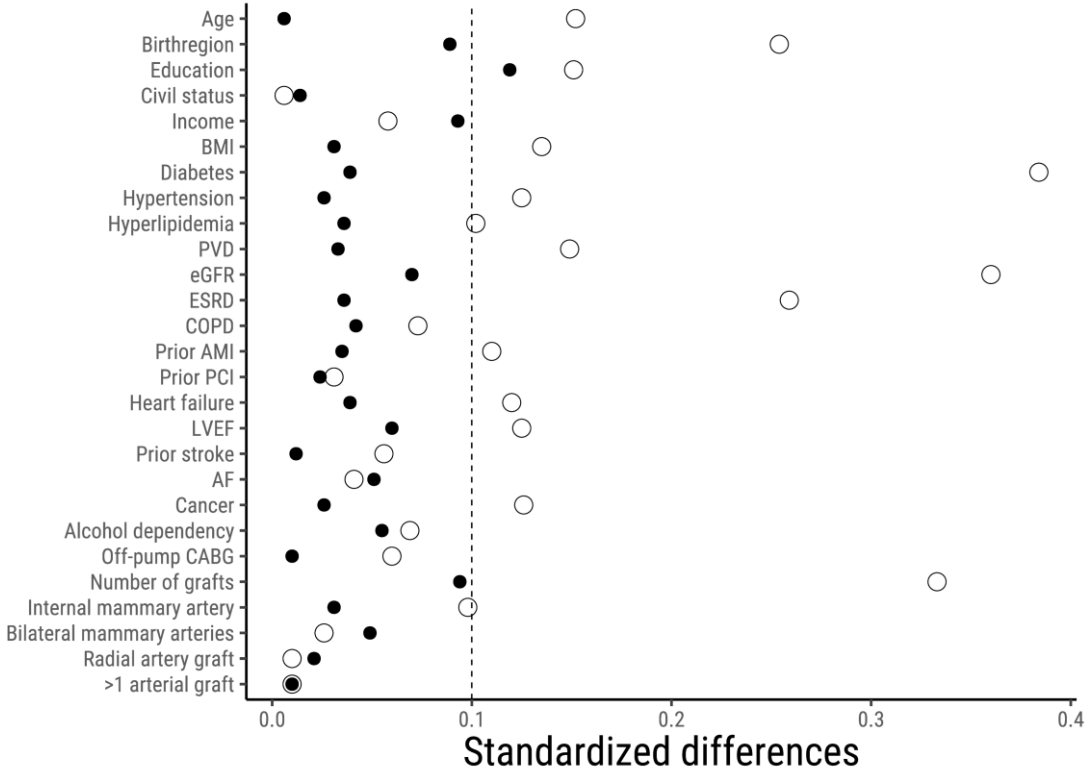

BMI = body mass index, PVD = peripheral vascular disease, eGFR = estimated glomerular filtration rate, ESRD = end-stage renal disease, COPD = chronic obstructive pulmonary disease, AMI = acute myocardial infarction, PCI = percutaneous coronary intervention, LVEF = left ventricular ejection fraction, AF = atrial fibrillation.

**Figure S3. Multivariable adjusted associations between patient characteristics and all-cause mortality. Hazard ratios are adjusted for all variables presented in Table 1.**

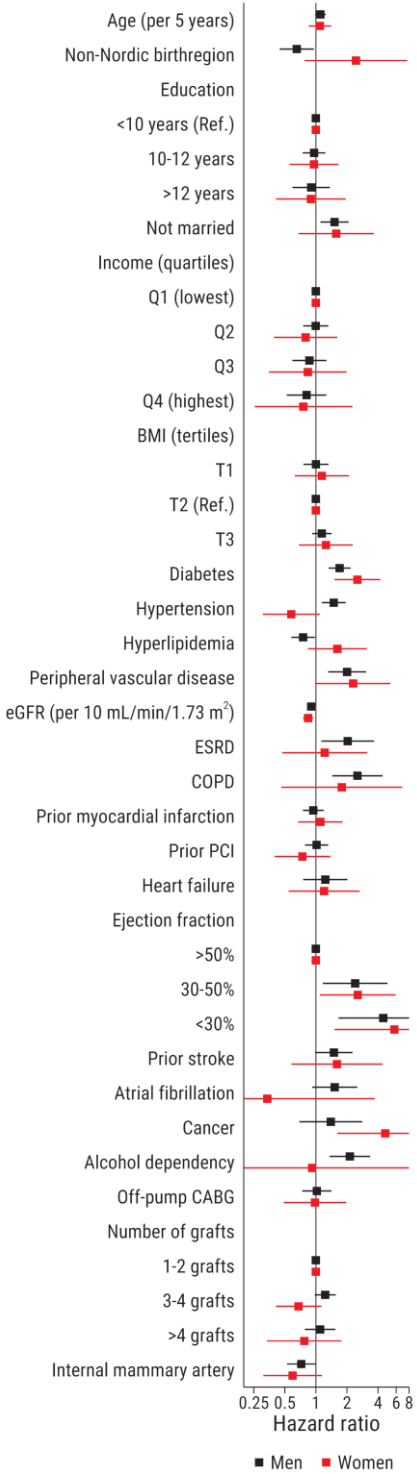

HR = hazard ratio, eGFR = estimated glomerular filtration rate, ESRD = end-stage renal disease, COPD = chronic obstructive pulmonary disease, LVEF = left ventricular ejection fraction.
